# Supplementary material for: The genetic diversity and population structure of two endemic Amazonian quillwort (Isoetes L.) species
Source: PeerJ. 2020 Nov 9;8:e10274. doi: 10.7717/peerj.10274 (PMC7659625; doi:10.7717/peerj.10274)
Supplement: Supplemental Information 4 — Nei’s genetic and geographic distance matrices. Mantel test matrix. [file peerj-08-10274-s004.xlsx]

## Sheet: Raw for Fig. 2
1	86	8	12	11	11	14	8	12	13	5	1	86
population	ISN3	ISN6	ISV	ISM
49N3	50N3	51N3	52N3	53N3	54N3	55N3	56N3	57N6	58N6	59N6	60N6	61N6	62N6	63N6	64N6	65N6	66N6	67N6	68N6	69V	70V	71V	72V	73V	74V	75V	76V	77V	78V	79V	80V	81V	82M	83M	84M	85M	86M
0																																						49N3
0.20548	0																																					50N3
0.24638	0.14286	0																																				51N3
0.31343	0.19118	0.14063	0																																			52N3
0.31081	0.22368	0.14706	0.14493	0																																		53N3
0.2973	0.23377	0.19178	0.2	0.16667	0																																	54N3
0.3494	0.2619	0.17568	0.23288	0.18182	0.14474	0																																55N3
0.30263	0.23077	0.18571	0.19403	0.21622	0.2027	0.15584	0																															56N3
0.38554	0.3494	0.31081	0.36486	0.32911	0.3375	0.23457	0.22368	0																														57N6
0.42169	0.36585	0.28169	0.3	0.28947	0.28	0.2716	0.30769	0.19737	0																													58N6
0.42169	0.40449	0.3875	0.4375	0.4186	0.4186	0.43011	0.43182	0.30864	0.25974	0																												59N6
0.40476	0.38889	0.38272	0.3875	0.37209	0.36471	0.38043	0.39773	0.29268	0.24359	0.16456	0																											60N6
0.375	0.36047	0.36364	0.37662	0.36585	0.33333	0.38202	0.39535	0.3125	0.26316	0.25	0.10526	0																										61N6
0.37931	0.36559	0.3494	0.37349	0.34091	0.34091	0.35789	0.3913	0.31034	0.26506	0.27273	0.13253	0.0641	0																									62N6
0.35632	0.37895	0.37209	0.40698	0.37363	0.39785	0.40404	0.40426	0.30682	0.32184	0.2093	0.13095	0.11111	0.11494	0																								63N6
0.36782	0.40217	0.39759	0.41463	0.39773	0.40449	0.41053	0.42857	0.32941	0.3253	0.22892	0.125	0.1039	0.08537	0.03704	0																							64N6
0.36047	0.37634	0.38372	0.38554	0.38889	0.37778	0.38542	0.40217	0.34091	0.29762	0.22353	0.14458	0.125	0.10588	0.08235	0.0375	0																						65N6
0.36471	0.38043	0.38095	0.39024	0.39326	0.35632	0.38298	0.40659	0.33721	0.28049	0.20482	0.12346	0.11392	0.10714	0.10588	0.075	0.04938	0																					66N6
0.4	0.33333	0.30488	0.34524	0.31461	0.30682	0.32632	0.39362	0.31461	0.27059	0.27778	0.16279	0.11111	0.10345	0.14444	0.13953	0.1573	0.15909	0																				67N6
0.36905	0.31818	0.3038	0.38272	0.34884	0.34884	0.35484	0.38889	0.32558	0.32143	0.2381	0.14634	0.14815	0.12941	0.12791	0.14458	0.16279	0.16471	0.09412	0																			68N6
0.37805	0.35632	0.36905	0.39759	0.34524	0.35227	0.37363	0.3908	0.35294	0.36145	0.27711	0.175	0.18987	0.15663	0.14286	0.11392	0.13415	0.125	0.16471	0.14815	0																		69V
0.39535	0.35556	0.35802	0.40244	0.35632	0.34118	0.34783	0.4	0.32558	0.32143	0.27907	0.18072	0.1519	0.18391	0.20225	0.2	0.21591	0.2	0.14943	0.15476	0.15	0																	70V
0.38824	0.34831	0.32911	0.375	0.32941	0.31325	0.32222	0.375	0.29762	0.29268	0.27059	0.17073	0.16456	0.15294	0.19318	0.19048	0.2069	0.2	0.13953	0.14458	0.13924	0.03846	0																71V
0.37647	0.33708	0.3375	0.375	0.32941	0.32143	0.34783	0.38202	0.32558	0.3012	0.29885	0.18072	0.1519	0.14118	0.20225	0.17857	0.1954	0.19767	0.14943	0.15476	0.10256	0.075	0.06329	0															72V
0.41176	0.35227	0.33333	0.4	0.37209	0.33735	0.36264	0.39773	0.36047	0.33735	0.29412	0.19512	0.1875	0.17647	0.21591	0.21429	0.22989	0.21176	0.18391	0.14634	0.14103	0.1125	0.07692	0.1125	0														73V
0.37647	0.31818	0.3038	0.3625	0.33721	0.3012	0.29213	0.36364	0.28571	0.28049	0.27907	0.18072	0.175	0.16279	0.20225	0.2	0.1954	0.18824	0.14943	0.13253	0.15	0.075	0.03846	0.075	0.08861	0													74V
0.39759	0.35632	0.32468	0.36364	0.35714	0.3	0.34831	0.38372	0.3253	0.27848	0.27711	0.19753	0.19231	0.17857	0.21839	0.21687	0.21176	0.21429	0.16471	0.17073	0.16667	0.08974	0.05263	0.08974	0.07895	0.06494	0												75V
0.37037	0.34884	0.32895	0.37662	0.3494	0.29114	0.32184	0.35714	0.3125	0.29487	0.28395	0.20253	0.19737	0.18293	0.22353	0.22222	0.21687	0.21951	0.16867	0.175	0.18182	0.1039	0.06667	0.1039	0.09333	0.07895	0.04167	0											76V
0.38554	0.34483	0.33333	0.37179	0.34524	0.30864	0.31818	0.35294	0.33333	0.30864	0.30588	0.25	0.24691	0.22989	0.26667	0.26744	0.26136	0.26437	0.21591	0.22353	0.2	0.14815	0.11392	0.125	0.13924	0.125	0.09211	0.0411	0										77V
0.39759	0.33721	0.32468	0.38462	0.33735	0.32099	0.31034	0.36471	0.32099	0.3038	0.29268	0.23457	0.23077	0.21429	0.23256	0.25301	0.24706	0.25	0.2	0.18519	0.19231	0.13924	0.1039	0.11538	0.10526	0.09091	0.08108	0.06667	0.0274	0									78V
0.35802	0.31765	0.30263	0.34211	0.33735	0.3	0.31034	0.3253	0.3253	0.3	0.27711	0.21951	0.225	0.2	0.23864	0.2381	0.23256	0.23529	0.2069	0.19277	0.18987	0.1375	0.10256	0.1375	0.12821	0.11392	0.10526	0.05479	0.04054	0.06757	0								79V
0.39759	0.35632	0.31579	0.33333	0.3494	0.3	0.32955	0.34524	0.34524	0.3	0.31765	0.24096	0.24691	0.2	0.27778	0.25882	0.25287	0.25581	0.24719	0.23529	0.2125	0.18293	0.15	0.16049	0.175	0.16049	0.12987	0.08108	0.09211	0.11842	0.05405	0							80V
0.39286	0.34091	0.32911	0.33766	0.34524	0.31325	0.35165	0.36782	0.34118	0.33735	0.30233	0.22619	0.20732	0.18605	0.24444	0.24419	0.25843	0.24138	0.19318	0.2	0.22892	0.23256	0.20238	0.21176	0.20482	0.23256	0.22892	0.18987	0.19512	0.2	0.1625	0.1625	0						81V
0.36264	0.34694	0.32558	0.32941	0.35789	0.37234	0.38835	0.37113	0.34737	0.3617	0.3125	0.31633	0.31579	0.31373	0.29412	0.29897	0.30693	0.31	0.28431	0.26804	0.29787	0.30303	0.27835	0.28571	0.29897	0.26804	0.28421	0.26374	0.27368	0.27174	0.24731	0.28421	0.28866	0					82M
0.3587	0.36	0.34091	0.34483	0.35417	0.35106	0.36893	0.38384	0.34375	0.34043	0.34343	0.33	0.32292	0.32692	0.32381	0.31313	0.32039	0.32353	0.28155	0.3	0.3125	0.3	0.27551	0.28283	0.31313	0.26531	0.28125	0.26087	0.27083	0.26882	0.26316	0.29897	0.32	0.04255	0				83M
0.33333	0.32979	0.30488	0.3	0.33333	0.33708	0.35052	0.35484	0.37363	0.34831	0.3617	0.34737	0.32967	0.30928	0.34	0.31183	0.30208	0.30208	0.29592	0.31579	0.3	0.30851	0.29032	0.28723	0.31915	0.27957	0.30435	0.29032	0.28261	0.29787	0.25556	0.27473	0.31915	0.05618	0.03371	0			84M
0.34091	0.32979	0.34091	0.34568	0.32584	0.33708	0.34021	0.35484	0.31461	0.33708	0.34043	0.31915	0.30337	0.29167	0.30612	0.28261	0.29897	0.30208	0.27083	0.28723	0.2809	0.28723	0.26087	0.25	0.30108	0.25806	0.27473	0.24419	0.26374	0.26136	0.25556	0.26667	0.29032	0.08791	0.04444	0.05882	0		85M
0.34091	0.35165	0.35294	0.37975	0.34884	0.32941	0.34409	0.3956	0.33721	0.36047	0.36264	0.32222	0.30588	0.29348	0.30851	0.28261	0.29032	0.30435	0.27174	0.28889	0.2907	0.30769	0.2809	0.26966	0.32222	0.27778	0.29545	0.26506	0.30337	0.30233	0.29545	0.30682	0.31111	0.125	0.08046	0.09756	0.04651	0	86M

## Sheet: Raw for Fig. 3_genetic x geogra
1	86	8	12	11	11	14	8	12	13	5	1	86
individuos	ISN3	ISN6	ISV	ISM
49N3	50N3	51N3	52N3	53N3	54N3	55N3	56N3	57N6	58N6	59N6	60N6	61N6	62N6	63N6	64N6	65N6	66N6	67N6	68N6	69V	70V	71V	72V	73V	74V	75V	76V	77V	78V	79V	80V	81V	82M	83M	84M	85M	86M
0	0	0	0	0	0	0	0	9.546	9.546	9.546	9.546	9.546	9.546	9.546	9.546	9.546	9.546	9.546	9.546	43003	43003	43003	43003	43003	43003	43003	43003	43003	43003	43003	43003	43003	41.25	41.25	41.25	41.25	41.25	49N3
0.20548	0	0	0	0	0	0	0	9.546	9.546	9.546	9.546	9.546	9.546	9.546	9.546	9.546	9.546	9.546	9.546	43003	43003	43003	43003	43003	43003	43003	43003	43003	43003	43003	43003	43003	41.25	41.25	41.25	41.25	41.25	50N3
0.24638	0.14286	0	0	0	0	0	0	9.546	9.546	9.546	9.546	9.546	9.546	9.546	9.546	9.546	9.546	9.546	9.546	43003	43003	43003	43003	43003	43003	43003	43003	43003	43003	43003	43003	43003	41.25	41.25	41.25	41.25	41.25	51N3	8
0.31343	0.19118	0.14063	0	0	0	0	0	9.546	9.546	9.546	9.546	9.546	9.546	9.546	9.546	9.546	9.546	9.546	9.546	43003	43003	43003	43003	43003	43003	43003	43003	43003	43003	43003	43003	43003	41.25	41.25	41.25	41.25	41.25	52N3
0.31081	0.22368	0.14706	0.14493	0	0	0	0	9.546	9.546	9.546	9.546	9.546	9.546	9.546	9.546	9.546	9.546	9.546	9.546	43003	43003	43003	43003	43003	43003	43003	43003	43003	43003	43003	43003	43003	41.25	41.25	41.25	41.25	41.25	53N3
0.2973	0.23377	0.19178	0.2	0.16667	0	0	0	9.546	9.546	9.546	9.546	9.546	9.546	9.546	9.546	9.546	9.546	9.546	9.546	43003	43003	43003	43003	43003	43003	43003	43003	43003	43003	43003	43003	43003	41.25	41.25	41.25	41.25	41.25	54N3
0.3494	0.2619	0.17568	0.23288	0.18182	0.14474	0	0	9.546	9.546	9.546	9.546	9.546	9.546	9.546	9.546	9.546	9.546	9.546	9.546	43003	43003	43003	43003	43003	43003	43003	43003	43003	43003	43003	43003	43003	41.25	41.25	41.25	41.25	41.25	55N3
0.30263	0.23077	0.18571	0.19403	0.21622	0.2027	0.15584	0	9.546	9.546	9.546	9.546	9.546	9.546	9.546	9.546	9.546	9.546	9.546	9.546	43003	43003	43003	43003	43003	43003	43003	43003	43003	43003	43003	43003	43003	41.25	41.25	41.25	41.25	41.25	56N3
0.38554	0.3494	0.31081	0.36486	0.32911	0.3375	0.23457	0.22368	0	0	0	0	0	0	0	0	0	0	0	0	35.783	35.783	35.783	35.783	35.783	35.783	35.783	35.783	35.783	35.783	35.783	35.783	35.783	36.358	36.358	36.358	36.358	36.358	57N6	12
0.42169	0.36585	0.28169	0.3	0.28947	0.28	0.2716	0.30769	0.19737	0	0	0	0	0	0	0	0	0	0	0	35.783	35.783	35.783	35.783	35.783	35.783	35.783	35.783	35.783	35.783	35.783	35.783	35.783	36.358	36.358	36.358	36.358	36.358	58N6
0.42169	0.40449	0.3875	0.4375	0.4186	0.4186	0.43011	0.43182	0.30864	0.25974	0	0	0	0	0	0	0	0	0	0	35.783	35.783	35.783	35.783	35.783	35.783	35.783	35.783	35.783	35.783	35.783	35.783	35.783	36.358	36.358	36.358	36.358	36.358	59N6
0.40476	0.38889	0.38272	0.3875	0.37209	0.36471	0.38043	0.39773	0.29268	0.24359	0.16456	0	0	0	0	0	0	0	0	0	35.783	35.783	35.783	35.783	35.783	35.783	35.783	35.783	35.783	35.783	35.783	35.783	35.783	36.358	36.358	36.358	36.358	36.358	60N6
0.375	0.36047	0.36364	0.37662	0.36585	0.33333	0.38202	0.39535	0.3125	0.26316	0.25	0.10526	0	0	0	0	0	0	0	0	35.783	35.783	35.783	35.783	35.783	35.783	35.783	35.783	35.783	35.783	35.783	35.783	35.783	36.358	36.358	36.358	36.358	36.358	61N6
0.37931	0.36559	0.3494	0.37349	0.34091	0.34091	0.35789	0.3913	0.31034	0.26506	0.27273	0.13253	0.0641	0	0	0	0	0	0	0	35.783	35.783	35.783	35.783	35.783	35.783	35.783	35.783	35.783	35.783	35.783	35.783	35.783	36.358	36.358	36.358	36.358	36.358	62N6
0.35632	0.37895	0.37209	0.40698	0.37363	0.39785	0.40404	0.40426	0.30682	0.32184	0.2093	0.13095	0.11111	0.11494	0	0	0	0	0	0	35.783	35.783	35.783	35.783	35.783	35.783	35.783	35.783	35.783	35.783	35.783	35.783	35.783	36.358	36.358	36.358	36.358	36.358	63N6
0.36782	0.40217	0.39759	0.41463	0.39773	0.40449	0.41053	0.42857	0.32941	0.3253	0.22892	0.125	0.1039	0.08537	0.03704	0	0	0	0	0	35.783	35.783	35.783	35.783	35.783	35.783	35.783	35.783	35.783	35.783	35.783	35.783	35.783	36.358	36.358	36.358	36.358	36.358	64N6
0.36047	0.37634	0.38372	0.38554	0.38889	0.37778	0.38542	0.40217	0.34091	0.29762	0.22353	0.14458	0.125	0.10588	0.08235	0.0375	0	0	0	0	35.783	35.783	35.783	35.783	35.783	35.783	35.783	35.783	35.783	35.783	35.783	35.783	35.783	36.358	36.358	36.358	36.358	36.358	65N6
0.36471	0.38043	0.38095	0.39024	0.39326	0.35632	0.38298	0.40659	0.33721	0.28049	0.20482	0.12346	0.11392	0.10714	0.10588	0.075	0.04938	0	0	0	35.783	35.783	35.783	35.783	35.783	35.783	35.783	35.783	35.783	35.783	35.783	35.783	35.783	36.358	36.358	36.358	36.358	36.358	66N6
0.4	0.33333	0.30488	0.34524	0.31461	0.30682	0.32632	0.39362	0.31461	0.27059	0.27778	0.16279	0.11111	0.10345	0.14444	0.13953	0.1573	0.15909	0	0	35.783	35.783	35.783	35.783	35.783	35.783	35.783	35.783	35.783	35.783	35.783	35.783	35.783	36.358	36.358	36.358	36.358	36.358	67N6
0.36905	0.31818	0.3038	0.38272	0.34884	0.34884	0.35484	0.38889	0.32558	0.32143	0.2381	0.14634	0.14815	0.12941	0.12791	0.14458	0.16279	0.16471	0.09412	0	35.783	35.783	35.783	35.783	35.783	35.783	35.783	35.783	35.783	35.783	35.783	35.783	35.783	36.358	36.358	36.358	36.358	36.358	68N6
0.37805	0.35632	0.36905	0.39759	0.34524	0.35227	0.37363	0.3908	0.35294	0.36145	0.27711	0.175	0.18987	0.15663	0.14286	0.11392	0.13415	0.125	0.16471	0.14815	0	0	0	0	0	0	0	0	0	0	0	0	0	5.02	5.02	5.02	5.02	5.02	69V	13
0.39535	0.35556	0.35802	0.40244	0.35632	0.34118	0.34783	0.4	0.32558	0.32143	0.27907	0.18072	0.1519	0.18391	0.20225	0.2	0.21591	0.2	0.14943	0.15476	0.15	0	0	0	0	0	0	0	0	0	0	0	0	5.02	5.02	5.02	5.02	5.02	70V
0.38824	0.34831	0.32911	0.375	0.32941	0.31325	0.32222	0.375	0.29762	0.29268	0.27059	0.17073	0.16456	0.15294	0.19318	0.19048	0.2069	0.2	0.13953	0.14458	0.13924	0.03846	0	0	0	0	0	0	0	0	0	0	0	5.02	5.02	5.02	5.02	5.02	71V
0.37647	0.33708	0.3375	0.375	0.32941	0.32143	0.34783	0.38202	0.32558	0.3012	0.29885	0.18072	0.1519	0.14118	0.20225	0.17857	0.1954	0.19767	0.14943	0.15476	0.10256	0.075	0.06329	0	0	0	0	0	0	0	0	0	0	5.02	5.02	5.02	5.02	5.02	72V
0.41176	0.35227	0.33333	0.4	0.37209	0.33735	0.36264	0.39773	0.36047	0.33735	0.29412	0.19512	0.1875	0.17647	0.21591	0.21429	0.22989	0.21176	0.18391	0.14634	0.14103	0.1125	0.07692	0.1125	0	0	0	0	0	0	0	0	0	5.02	5.02	5.02	5.02	5.02	73V
0.37647	0.31818	0.3038	0.3625	0.33721	0.3012	0.29213	0.36364	0.28571	0.28049	0.27907	0.18072	0.175	0.16279	0.20225	0.2	0.1954	0.18824	0.14943	0.13253	0.15	0.075	0.03846	0.075	0.08861	0	0	0	0	0	0	0	0	5.02	5.02	5.02	5.02	5.02	74V
0.39759	0.35632	0.32468	0.36364	0.35714	0.3	0.34831	0.38372	0.3253	0.27848	0.27711	0.19753	0.19231	0.17857	0.21839	0.21687	0.21176	0.21429	0.16471	0.17073	0.16667	0.08974	0.05263	0.08974	0.07895	0.06494	0	0	0	0	0	0	0	5.02	5.02	5.02	5.02	5.02	75V
0.37037	0.34884	0.32895	0.37662	0.3494	0.29114	0.32184	0.35714	0.3125	0.29487	0.28395	0.20253	0.19737	0.18293	0.22353	0.22222	0.21687	0.21951	0.16867	0.175	0.18182	0.1039	0.06667	0.1039	0.09333	0.07895	0.04167	0	0	0	0	0	0	5.02	5.02	5.02	5.02	5.02	76V
0.38554	0.34483	0.33333	0.37179	0.34524	0.30864	0.31818	0.35294	0.33333	0.30864	0.30588	0.25	0.24691	0.22989	0.26667	0.26744	0.26136	0.26437	0.21591	0.22353	0.2	0.14815	0.11392	0.125	0.13924	0.125	0.09211	0.0411	0	0	0	0	0	5.02	5.02	5.02	5.02	5.02	77V
0.39759	0.33721	0.32468	0.38462	0.33735	0.32099	0.31034	0.36471	0.32099	0.3038	0.29268	0.23457	0.23077	0.21429	0.23256	0.25301	0.24706	0.25	0.2	0.18519	0.19231	0.13924	0.1039	0.11538	0.10526	0.09091	0.08108	0.06667	0.0274	0	0	0	0	5.02	5.02	5.02	5.02	5.02	78V
0.35802	0.31765	0.30263	0.34211	0.33735	0.3	0.31034	0.3253	0.3253	0.3	0.27711	0.21951	0.225	0.2	0.23864	0.2381	0.23256	0.23529	0.2069	0.19277	0.18987	0.1375	0.10256	0.1375	0.12821	0.11392	0.10526	0.05479	0.04054	0.06757	0	0	0	5.02	5.02	5.02	5.02	5.02	79V
0.39759	0.35632	0.31579	0.33333	0.3494	0.3	0.32955	0.34524	0.34524	0.3	0.31765	0.24096	0.24691	0.2	0.27778	0.25882	0.25287	0.25581	0.24719	0.23529	0.2125	0.18293	0.15	0.16049	0.175	0.16049	0.12987	0.08108	0.09211	0.11842	0.05405	0	0	5.02	5.02	5.02	5.02	5.02	80V
0.39286	0.34091	0.32911	0.33766	0.34524	0.31325	0.35165	0.36782	0.34118	0.33735	0.30233	0.22619	0.20732	0.18605	0.24444	0.24419	0.25843	0.24138	0.19318	0.2	0.22892	0.23256	0.20238	0.21176	0.20482	0.23256	0.22892	0.18987	0.19512	0.2	0.1625	0.1625	0	5.02	5.02	5.02	5.02	5.02	81V
0.36264	0.34694	0.32558	0.32941	0.35789	0.37234	0.38835	0.37113	0.34737	0.3617	0.3125	0.31633	0.31579	0.31373	0.29412	0.29897	0.30693	0.31	0.28431	0.26804	0.29787	0.30303	0.27835	0.28571	0.29897	0.26804	0.28421	0.26374	0.27368	0.27174	0.24731	0.28421	0.28866	0	0	0	0	0	82M	5
0.3587	0.36	0.34091	0.34483	0.35417	0.35106	0.36893	0.38384	0.34375	0.34043	0.34343	0.33	0.32292	0.32692	0.32381	0.31313	0.32039	0.32353	0.28155	0.3	0.3125	0.3	0.27551	0.28283	0.31313	0.26531	0.28125	0.26087	0.27083	0.26882	0.26316	0.29897	0.32	0.04255	0	0	0	0	83M
0.33333	0.32979	0.30488	0.3	0.33333	0.33708	0.35052	0.35484	0.37363	0.34831	0.3617	0.34737	0.32967	0.30928	0.34	0.31183	0.30208	0.30208	0.29592	0.31579	0.3	0.30851	0.29032	0.28723	0.31915	0.27957	0.30435	0.29032	0.28261	0.29787	0.25556	0.27473	0.31915	0.05618	0.03371	0	0	0	84M
0.34091	0.32979	0.34091	0.34568	0.32584	0.33708	0.34021	0.35484	0.31461	0.33708	0.34043	0.31915	0.30337	0.29167	0.30612	0.28261	0.29897	0.30208	0.27083	0.28723	0.2809	0.28723	0.26087	0.25	0.30108	0.25806	0.27473	0.24419	0.26374	0.26136	0.25556	0.26667	0.29032	0.08791	0.04444	0.05882	0	0	85M
0.34091	0.35165	0.35294	0.37975	0.34884	0.32941	0.34409	0.3956	0.33721	0.36047	0.36264	0.32222	0.30588	0.29348	0.30851	0.28261	0.29032	0.30435	0.27174	0.28889	0.2907	0.30769	0.2809	0.26966	0.32222	0.27778	0.29545	0.26506	0.30337	0.30233	0.29545	0.30682	0.31111	0.125	0.08046	0.09756	0.04651	0	86M

## Sheet: Raw for Fig2 and 3_Average
Mean Population Genetic Distance Matrix for Binary Distance
Pairwise Population Matrix of Nei Genetic Distance								Nei genetic Distance x Geographic distance
N3	N6	V	M				N3	N6	V	M
0				N3			0	9.546	43.003	41.25	N3
0.0812178	0			N6			0.0812178	0	35.783	36.358	N6
0.141822	0.128734	0		V			0.141822	0.128734	0	5.02	V
0.243998	0.225763	0.120428	0	M			0.243998	0.225763	0.120428	0	M
Mean Population Genetic Distance Matrix for Binary Distance	Planilha2	Pairwise Population Matrix of Nei Genetic Identity
N3	N6	V	M
1				N3
0.921993	1			N6
0.867776	0.879208	1		V
0.783489	0.797907	0.886541	1	M
Warning! Results should be treated with caution given the following:
There is 8% missing data at the locus '40' in the population 'N!
There is 8% missing data at the locus 'Locus12' in the population 'N!
There is 8% missing data at the locus 'Locus13' in the population 'N!
There is 8% missing data at the locus 'Locus14' in the population 'N!
There is 8% missing data at the locus 'Locus15' in the population 'N!
There is 8% missing data at the locus 'Locus16' in the population 'N!
There is 8% missing data at the locus 'Locus17' in the population 'N!
There is 8% missing data at the locus 'Locus18' in the population 'N!
There is 12% missing data at the locus '41' in the population 'N3!
There is 8% missing data at the locus '41' in the population 'N6!
There is 12% missing data at the locus 'Locus35' in the population 'N3!
There is 8% missing data at the locus 'Locus35' in the population 'N6!
There is 12% missing data at the locus 'Locus36' in the population 'N3!
There is 8% missing data at the locus 'Locus36' in the population 'N6!
There is 12% missing data at the locus 'Locus37' in the population 'N3!
There is 12% missing data at the locus 'Locus38' in the population 'N3!
There is 12% missing data at the locus 'Locus39' in the population 'N3!
There is 12% missing data at the locus 'Locus40' in the population 'N3!
There is 14% missing data at the locus '42' in the population 'O!
There is 14% missing data at the locus 'Locus42' in the population 'O!
There is 14% missing data at the locus 'Locus43' in the population 'O!
There is 14% missing data at the locus 'Locus44' in the population 'O!
There is 14% missing data at the locus 'Locus45' in the population 'O!
There is 21% missing data at the locus 'Locus46' in the population 'O!
There is 12% missing data at the locus '1' in the population 'N3!
There is 20% missing data at the locus '1' in the population 'M!
There is 12% missing data at the locus 'Locus48' in the population 'N3!
There is 20% missing data at the locus 'Locus48' in the population 'M!
There is 12% missing data at the locus 'Locus49' in the population 'N3!
There is 20% missing data at the locus 'Locus49' in the population 'M!
There is 7% missing data at the locus 'Locus50' in the population 'O!
There is 12% missing data at the locus 'Locus50' in the population 'N3!
There is 20% missing data at the locus 'Locus50' in the population 'M!
There is 7% missing data at the locus 'Locus51' in the population 'O!
There is 12% missing data at the locus 'Locus51' in the population 'N3!
There is 20% missing data at the locus 'Locus51' in the population 'M!
There is 7% missing data at the locus 'Locus52' in the population 'O!
There is 12% missing data at the locus 'Locus52' in the population 'N3!
There is 20% missing data at the locus 'Locus52' in the population 'M!
There is 7% missing data at the locus 'Locus53' in the population 'O!
There is 12% missing data at the locus 'Locus53' in the population 'N3!
There is 20% missing data at the locus 'Locus53' in the population 'M!
There is 7% missing data at the locus 'Locus54' in the population 'O!
There is 12% missing data at the locus 'Locus54' in the population 'N3!
There is 20% missing data at the locus 'Locus54' in the population 'M!
There is 8% missing data at the locus '2' in the population 'N!
There is 9% missing data at the locus '2' in the population 'S!
There is 21% missing data at the locus '2' in the population 'O!
There is 8% missing data at the locus 'Locus56' in the population 'N!
There is 9% missing data at the locus 'Locus56' in the population 'S!
There is 21% missing data at the locus 'Locus56' in the population 'O!
There is 8% missing data at the locus 'Locus57' in the population 'N!
There is 9% missing data at the locus 'Locus57' in the population 'S!
There is 21% missing data at the locus 'Locus57' in the population 'O!
There is 8% missing data at the locus 'Locus58' in the population 'N!
There is 9% missing data at the locus 'Locus58' in the population 'S!
There is 21% missing data at the locus 'Locus58' in the population 'O!
There is 8% missing data at the locus 'Locus59' in the population 'N!
There is 18% missing data at the locus 'Locus59' in the population 'S!
There is 21% missing data at the locus 'Locus59' in the population 'O!
There is 8% missing data at the locus '6' in the population 'N!
There is 8% missing data at the locus 'Locus69' in the population 'N!
There is 8% missing data at the locus 'Locus70' in the population 'N!
There is 8% missing data at the locus 'Locus71' in the population 'N!
There is 8% missing data at the locus 'Locus72' in the population 'N!
There is 8% missing data at the locus 'Locus73' in the population 'N!
There is 8% missing data at the locus 'Locus74' in the population 'N!
There is 8% missing data at the locus 'Locus75' in the population 'N!
There is 8% missing data at the locus 'Locus76' in the population 'N!
There is 7% missing data at the locus '43' in the population 'O!
There is 7% missing data at the locus '43' in the population 'V!
There is 40% missing data at the locus '43' in the population 'M!
There is 7% missing data at the locus 'Locus90' in the population 'O!
There is 7% missing data at the locus 'Locus90' in the population 'V!
There is 40% missing data at the locus 'Locus90' in the population 'M!
There is 7% missing data at the locus 'Locus91' in the population 'O!
There is 7% missing data at the locus 'Locus91' in the population 'V!
There is 40% missing data at the locus 'Locus91' in the population 'M!
There is 7% missing data at the locus 'Locus92' in the population 'O!
There is 7% missing data at the locus 'Locus92' in the population 'V!
There is 40% missing data at the locus 'Locus92' in the population 'M!
There is 7% missing data at the locus 'Locus93' in the population 'O!
There is 7% missing data at the locus 'Locus93' in the population 'V!
There is 40% missing data at the locus 'Locus93' in the population 'M!
There is 7% missing data at the locus 'Locus94' in the population 'O!
There is 7% missing data at the locus 'Locus94' in the population 'V!
There is 40% missing data at the locus 'Locus94' in the population 'M!
There is 7% missing data at the locus 'Locus95' in the population 'O!
There is 7% missing data at the locus 'Locus95' in the population 'V!
There is 40% missing data at the locus 'Locus95' in the population 'M!
There is 7% missing data at the locus 'Locus96' in the population 'O!
There is 7% missing data at the locus 'Locus96' in the population 'V!
There is 40% missing data at the locus 'Locus96' in the population 'M!
There is 21% missing data at the locus '52' in the population 'O!
There is 8% missing data at the locus '52' in the population 'N6!
There is 7% missing data at the locus '52' in the population 'V!
There is 21% missing data at the locus 'Locus98' in the population 'O!
There is 8% missing data at the locus 'Locus98' in the population 'N6!
There is 7% missing data at the locus 'Locus98' in the population 'V!
There is 21% missing data at the locus 'Locus99' in the population 'O!
There is 8% missing data at the locus 'Locus99' in the population 'N6!
There is 7% missing data at the locus 'Locus99' in the population 'V!
There is 28% missing data at the locus 'Locus100' in the population 'O!
There is 8% missing data at the locus 'Locus100' in the population 'N6!
There is 7% missing data at the locus 'Locus100' in the population 'V!
There is 21% missing data at the locus 'Locus101' in the population 'O!
There is 8% missing data at the locus 'Locus101' in the population 'N6!
There is 7% missing data at the locus 'Locus101' in the population 'V!
There is 21% missing data at the locus 'Locus102' in the population 'O!
There is 8% missing data at the locus 'Locus102' in the population 'N6!
There is 7% missing data at the locus 'Locus102' in the population 'V!
There is 21% missing data at the locus 'Locus103' in the population 'O!
There is 8% missing data at the locus 'Locus103' in the population 'N6!
There is 7% missing data at the locus 'Locus103' in the population 'V!
There is 14% missing data at the locus 'Locus104' in the population 'O!
There is 8% missing data at the locus 'Locus104' in the population 'N6!
There is 7% missing data at the locus 'Locus104' in the population 'V!
There is 16% missing data at the locus '48' in the population 'N6!
There is 20% missing data at the locus '48' in the population 'M!
There is 16% missing data at the locus 'Locus106' in the population 'N6!
There is 20% missing data at the locus 'Locus106' in the population 'M!
There is 16% missing data at the locus 'Locus107' in the population 'N6!
There is 20% missing data at the locus 'Locus107' in the population 'M!
There is 16% missing data at the locus 'Locus108' in the population 'N6!
There is 20% missing data at the locus 'Locus108' in the population 'M!
There is 16% missing data at the locus 'Locus109' in the population 'N6!
There is 20% missing data at the locus 'Locus109' in the population 'M!
There is 16% missing data at the locus 'Locus110' in the population 'N6!
There is 20% missing data at the locus 'Locus110' in the population 'M!

## Sheet: Raw for Fig 3_graph
									Nei genetic Distance x Geographic distance
			N3	N3	N3	N3	N6	N6	N6	N6	V	V	V	V	M	M	M	M
		N3	0	0	0	0	9.546	9.566	9.546	9.546	42.003	42.006	42.002	42.003	41.25	41.1	41.3	41.4
		N3	0	0	0	0	9.54	9.48	9.542	9.55	42.004	42.005	42.005	41.993	41.27	41.28	41.29	41.31
		N3	0	0	0	0	9.532	9.55	9.53	9.55	42	42.007	42.006	42.002	41.24	41.3	41.26	41.18
		N3	0	0	0	0	9.566	9.59	9.549	9.534	42.001	42	42.001	42.011	41.23	41.35	41.19	41
		N6	0.083	0.081	0.081	0.075	0	0	0	0	35.783	35.9	35.79	35.725	36.36	36.358	36.362	36.36
		N6	0.079	0.085	0.087	0.079	0	0	0	0	35.73	35.78	35.97	35.79	36.38	36.38	36.362	36.383
		N6	0.09	0.074	0.079	0.084	0	0	0	0	35.79	35.76	35.81	35.82	36.33	36.35	36.361	36.341
		N6	0.073	0.084	0.077	0.089	0	0	0	0	35.699	35.7	35.73	35.8	36.344	36.344	36.348	36.35
		V	0.142	0.142	0.145	0.145	0.123	0.129	0.132	0.127	0	0	0	0	5.02	5.02	5.02	5.03
		V	0.147	0.139	0.139	0.139	0.129	0.132	0.13	0.132	0	0	0	0	5.01	5.009	5.01	5.01
		V	0.148	0.137	0.145	0.144	0.134	0.128	0.1288	0.131	0	0	0	0	5.005	5.025	5.05	5.005
		V	0.133	0.151	0.139	0.14	0.13	0.127	0.127	0.128	0	0	0	0	5.03	5.04	5.03	5.04
		M	0.246	0.245	0.24	0.244	0.222	0.227	0.238	0.227	0.123	0.123	0.122	0.12	0	0	0	0
		M	0.23	0.222	0.255	0.224	0.23	0.225	0.225	0.226	0.127	0.120428	0.121	0.123	0	0	0	0
		M	0.251	0.254	0.247	0.251	0.228	0.226	0.224	0.225	0.101	0.118	0.119	0.12	0	0	0	0
		M	0.25	0.258	0.234	0.257	0.23	0.224	0.218	0.227	0.127	0.1201	0.12	0.119	0	0	0	0

## Sheet: Mantel Test
						Nei genetic Distance x Geographic distance
Nei genetic Distance	N3	N3	N3	N3	N6	N6	N6	N6	V	V	V	V	M	M	M	M
N3	0	0	0	0	0.083	0.079	0.09	0.073	0.142	0.147	0.148	0.133	0.246	0.23	0.251	0.25
N3	0	0	0	0	0.081	0.085	0.074	0.084	0.142	0.139	0.137	0.151	0.245	0.222	0.254	0.258
N3	0	0	0	0	0.081	0.087	0.079	0.077	0.145	0.139	0.145	0.139	0.24	0.255	0.247	0.234
N3	0	0	0	0	0.075	0.079	0.084	0.089	0.145	0.139	0.144	0.14	0.244	0.224	0.251	0.257
N6	0.083	0.081	0.081	0.075	0	0	0	0	0.123	0.129	0.134	0.13	0.222	0.23	0.228	0.23
N6	0.079	0.085	0.087	0.079	0	0	0	0	0.129	0.132	0.128	0.127	0.227	0.225	0.226	0.224
N6	0.09	0.074	0.079	0.084	0	0	0	0	0.132	0.13	0.1288	0.127	0.238	0.225	0.224	0.218
N6	0.073	0.084	0.077	0.089	0	0	0	0	0.127	0.132	0.131	0.128	0.227	0.226	0.225	0.227
V	0.142	0.142	0.145	0.145	0.123	0.129	0.132	0.127	0	0	0	0	0.123	0.127	0.101	0.127
V	0.147	0.139	0.139	0.139	0.129	0.132	0.13	0.132	0	0	0	0	0.123	0.120428	0.118	0.1201
V	0.148	0.137	0.145	0.144	0.134	0.128	0.1288	0.131	0	0	0	0	0.122	0.121	0.119	0.12
V	0.133	0.151	0.139	0.14	0.13	0.127	0.127	0.128	0	0	0	0	0.12	0.123	0.12	0.119
M	0.246	0.245	0.24	0.244	0.222	0.227	0.238	0.227	0.123	0.123	0.122	0.12	0	0	0	0
M	0.23	0.222	0.255	0.224	0.23	0.225	0.225	0.226	0.127	0.120428	0.121	0.123	0	0	0	0
M	0.251	0.254	0.247	0.251	0.228	0.226	0.224	0.225	0.101	0.118	0.119	0.12	0	0	0	0
M	0.25	0.258	0.234	0.257	0.23	0.224	0.218	0.227	0.127	0.1201	0.12	0.119	0	0	0	0
Geographic distance	N3	N3	N3	N3	N6	N6	N6	N6	V	V	V	V	M	M	M	M
N3	0	0	0	0	9.546	9.566	9.546	9.546	42.003	42.006	42.002	42.003	41.25	41.1	41.3	41.4
N3	0	0	0	0	9.54	9.48	9.542	9.55	42.004	42.005	42.005	41.993	41.27	41.28	41.29	41.31
N3	0	0	0	0	9.532	9.55	9.53	9.55	42	42.007	42.006	42.002	41.24	41.3	41.26	41.18
N3	0	0	0	0	9.566	9.59	9.549	9.534	42.001	42	42.001	42.011	41.23	41.35	41.19	41
N6	9.546	9.54	9.532	9.566	0	0	0	0	35.783	35.9	35.79	35.725	36.36	36.358	36.362	36.36
N6	9.566	9.48	9.55	9.59	0	0	0	0	35.73	35.78	35.97	35.79	36.38	36.38	36.362	36.383
N6	9.546	9.542	9.53	9.549	0	0	0	0	35.79	35.76	35.81	35.82	36.33	36.35	36.361	36.341
N6	9.546	9.55	9.55	9.534	0	0	0	0	35.699	35.7	35.73	35.8	36.344	36.344	36.348	36.35
V	42.003	42.004	42	42.001	35.783	35.73	35.79	35.699	0	0	0	0	5.02	5.02	5.02	5.03
V	42.006	42.005	42.007	42	35.9	35.78	35.76	35.7	0	0	0	0	5.01	5.009	5.01	5.01
V	42.002	42.005	42.006	42.001	35.79	35.97	35.81	35.73	0	0	0	0	5.005	5.025	5.05	5.005
V	42.003	41.993	42.002	42.011	35.725	35.79	35.82	35.8	0	0	0	0	5.03	5.04	5.03	5.04
M	41.25	41.27	41.24	41.23	36.36	36.38	36.33	36.344	5.02	5.01	5.005	5.03	0	0	0	0
M	41.1	41.28	41.3	41.35	36.358	36.38	36.35	36.344	5.02	5.009	5.025	5.04	0	0	0	0
M	41.3	41.29	41.26	41.19	36.362	36.362	36.361	36.348	5.02	5.01	5.05	5.03	0	0	0	0
M	41.4	41.31	41.18	41	36.36	36.383	36.341	36.35	5.03	5.01	5.005	5.04	0	0	0	0
	XLSTAT 2014.5.03 - Mantel test - on 01/08/2020 at 17:44:38
	Matrix A: Workbook = dist geneti x dist geografica GPS (certo).xlsx / Sheet = Planilha14 / Range = Planilha14!$A$1:$Q$17 / 16 rows and 16 columns
	Matrix B: Workbook = dist geneti x dist geografica GPS (certo).xlsx / Sheet = Planilha14 / Range = Planilha14!$A$20:$Q$36 / 16 rows and 16 columns
	Significance level (%): 5
	Type of correlation: Pearson
	Seed (random numbers): 695828372
	Mantel test / Two-tailed test:
	r(AB)	0.820769
	p-value (Two-tailed)	< 0,0001
	alpha	0.05
	Test interpretation:
	H0: The matrices are not correlated.
	Ha: The matrices are correlated.
	As the computed p-value is lower than the significance level alpha=0,05, one should reject the null hypothesis H0, and accept the alternative hypothesis Ha.
	The risk to reject the null hypothesis H0 while it is true is lower than 0,01%.
	The p-value has been calculated using the distribution of r(AB) estimated from 10000 permutations.
